# Supplementary material for: Araloside C attenuates atherosclerosis by modulating macrophage polarization via Sirt1-mediated autophagy
Source: PubMed Central journal article supplement (PMC7053643; doi:10.18632/aging.102708), 2020-01-27
Supplement: aging-12-102708-s002..pdf [file aging-12-102708-s002..pdf]

**SUPPLEMENTARY FIGURES**

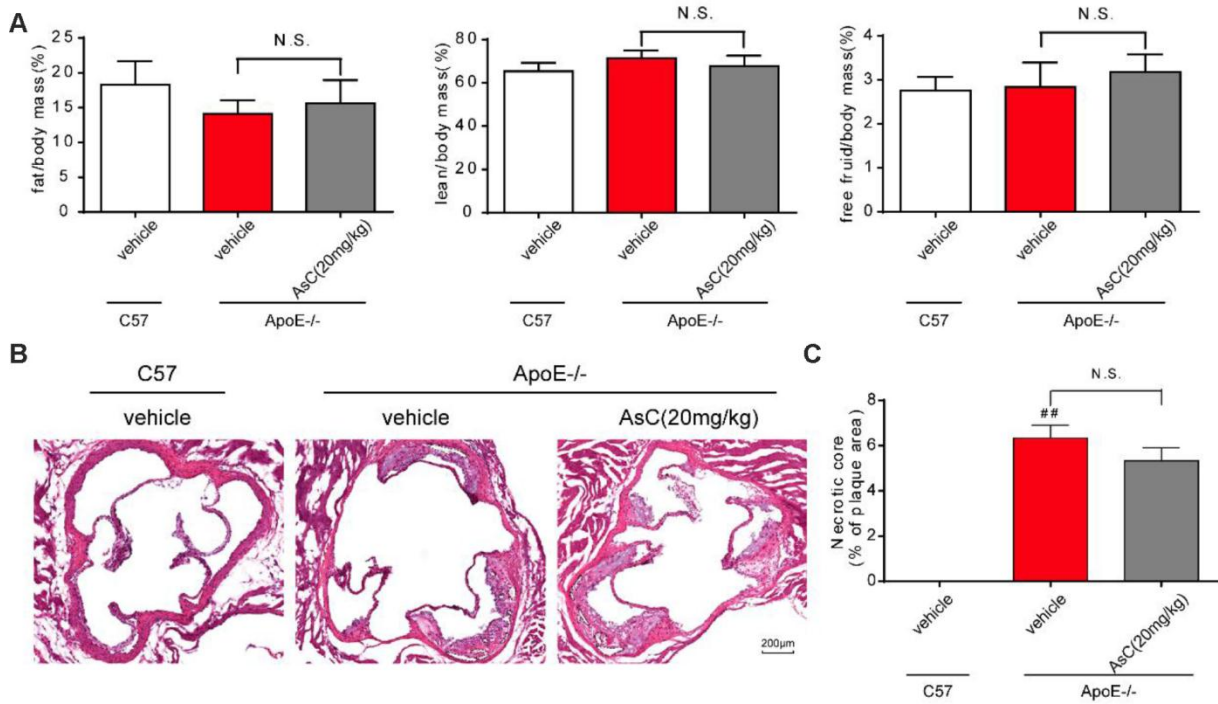

**Supplementary Figure 1. The effects of AsC on body component and necrosis area in HFD-treated mice. (A)** The fat, lean and free fruid level in all mice. **(B)** HE staining of aortic root in all mice. **(C)** The statistic results of necrotic core described in **(B)**. Data are presented as means ± SD (n = 5). <sup>##</sup>*P* < 0.01 vs. the Control group; N.S. means no significance.

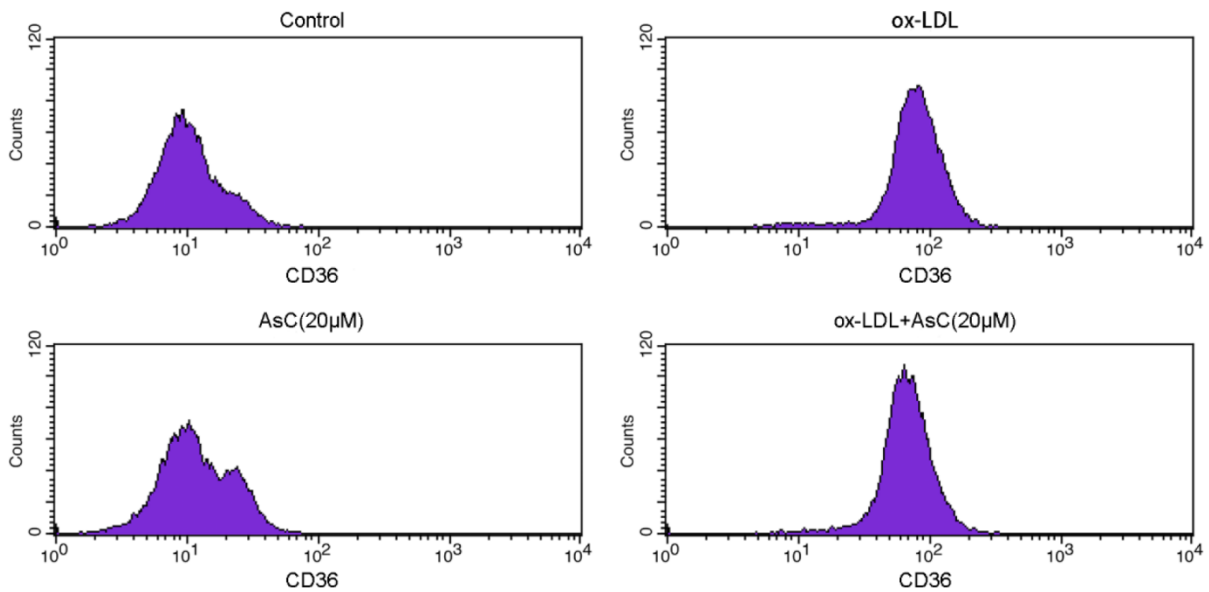

**Supplementary Figure 2. The representative results of Cd36 detected by flow cytometry.**

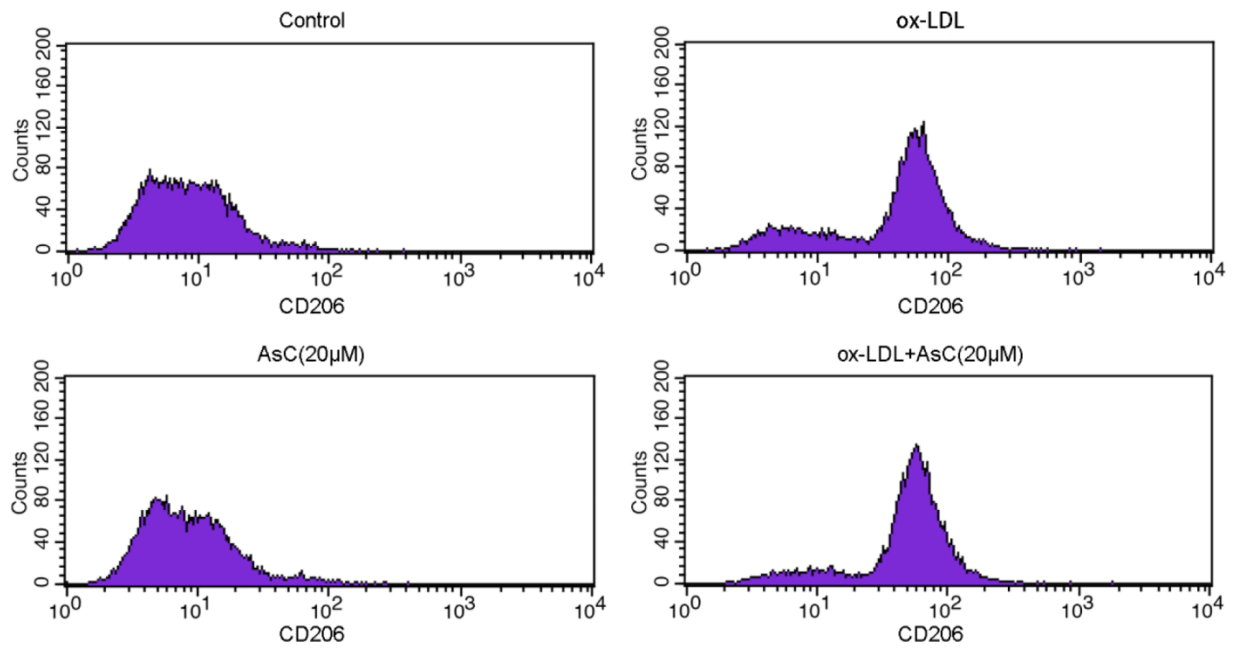

Supplementary Figure 3. The representative results of Mrc1 detected by flow cytometry.
